# Supplementary material for: Synthesis of sequence-determined bottlebrush polymers based on sequence determination in living anionic copolymerization of styrene and dimethyl(4-(1-phenylvinyl)phenyl)silane
Source: Royal Society of Chemistry journal article supplement (doi:10.1039/c6py00085a), 2016-01-01
Supplement: c6py00085a1.pdf [file c6py00085a1.pdf]

## Synthesis of Sequence-Determined Bottlebrush Polymers Based on Sequence

### Determination in Living Anionic Copolymerization of Styrene and Dimethyl(4-(1-phenylvinyl)phenyl)silane

Qiuyun Wang,<sup>‡</sup> Hongwei Ma,<sup>‡</sup> Wei Sang, Li Han, Pibo Liu, Heyu Shen, Wei Huang, Xichen Gong, Lincan Yang, Yurong Wang, Yang Li\*

State Key Laboratory of Fine Chemicals, Liaoning Key Laboratory of Polymer Science and Engineering, Department of Polymer Science and Engineering, School of Chemical Engineering, Dalian University of Technology, Dalian 116024, China

**Table S1.** The results of taken samples during copolymerization of styrene and DPE-SiH (**G4**, **G6**, and **G10**) with monomer molar feed ratio varying as styrene:DPE-SiH= 4, 6, 3.

| sample <sup>a</sup> | Time [min] | $M_n^b$ ( $/10^3$ ) | PDI <sup>b</sup> | $N_S/N_D^c$ | $N_D^d$ | $N_S^e$ | Con. DPE <sup>g</sup> [%] | Con. st <sup>h</sup> [%] |
|---------------------|------------|---------------------|------------------|-------------|---------|---------|---------------------------|--------------------------|
| <b>G4</b>           | 45         | 2.1                 | 1.08             | 1.29        | 5.6     | 7.6     | 57.9                      | 19.5                     |
|                     | 60         | 2.5                 | 1.12             | 1.43        | 6.4     | 9.4     | 66.3                      | 24.1                     |
|                     | 75         | 3.0                 | 1.14             | 1.77        | 7.1     | 12.6    | 72.9                      | 32.1                     |
|                     | 90         | 3.8                 | 1.17             | 2.68        | 7.4     | 20.7    | 75.5                      | 52.7                     |
|                     | 105        | 4.8                 | 1.36             | 3.71        | 7.7     | 28.9    | 78.9                      | 73.8                     |
|                     | 120        | 5.2                 | 1.37             | 3.78        | 8.2     | 31.6    | 84.6                      | 80.5                     |
|                     | 135        | 5.6                 | 1.24             | 3.86        | 8.7     | 33.8    | 89.9                      | 86.1                     |
|                     | 150        | 6.0                 | 1.27             | 3.93        | 9.2     | 37.6    | 94.7                      | 95.8                     |
|                     | 180        | 6.2                 | 1.29             | 3.96        | 9.5     | 38.8    | 97.9                      | 98.7                     |
|                     | 480        | 6.4                 | 1.33             | 4.06        | 9.7     | 39.9    | 100                       | 100                      |
| <b>G6</b>           | 60         | 4.0                 | 1.12             | 1.68        | 9.6     | 16.6    | 64.3                      | 17.3                     |
|                     | 75         | 5.6                 | 1.14             | 2.15        | 11.9    | 26.5    | 80.2                      | 27.7                     |
|                     | 90         | 7.8                 | 1.17             | 3.42        | 13.1    | 45.2    | 87.6                      | 47.2                     |
|                     | 120        | 12.0                | 1.27             | 5.83        | 14.1    | 83.0    | 95.2                      | 86.6                     |
|                     | 240        | 13.2                | 1.30             | 6.30        | 14.7    | 93.1    | 99.5                      | 97.1                     |
|                     | 480        | 13.4                | 1.35             | 6.40        | 14.8    | 94.9    | 100                       | 100                      |
| <b>G10</b>          | 45         | 2.2                 | 1.10             | 1           | 6.4     | 6.4     | 25.5                      | 7.8                      |
|                     | 60         | 2.8                 | 1.17             | 1.11        | 7.9     | 8.82    | 31.2                      | 10.8                     |
|                     | 75         | 4.0                 | 1.12             | 1.16        | 11.1    | 12.9    | 44.4                      | 16.1                     |
|                     | 90         | 4.8                 | 1.13             | 1.27        | 13.0    | 16.8    | 52.2                      | 20.6                     |
|                     | 105        | 5.3                 | 1.12             | 1.33        | 14.0    | 18.7    | 55.5                      | 23.0                     |
|                     | 120        | 6.3                 | 1.11             | 1.47        | 16.0    | 23.7    | 63.1                      | 29.0                     |
|                     | 135        | 7.0                 | 1.11             | 1.58        | 17.4    | 27.5    | 68.6                      | 33.7                     |
|                     | 150        | 8.2                 | 1.14             | 1.96        | 18.5    | 36.4    | 73.1                      | 44.7                     |
|                     | 180        | 11.0                | 1.19             | 2.88        | 20.4    | 58.9    | 80.8                      | 72.3                     |
|                     | 210        | 13.0                | 1.21             | 3.11        | 23.1    | 71.9    | 91.4                      | 88.3                     |
|                     | 270        | 14.0                | 1.23             | 3.23        | 24.2    | 79.1    | 96.1                      | 96.8                     |
|                     | 330        | 14.1                | 1.25             | 3.26        | 24.5    | 79.3    | 97.4                      | 97                       |
|                     | 480        | 14.5                | 1.26             | 3.31        | 24.9    | 82.4    | 100                       | 100                      |

<sup>a</sup> P(St-co-DPE-SiH) is copolymerized at 50 °C, and the  $[M_S]/[M]_D$  for **G4**, **G6**, **G10** was 4, 6, 3,

respectively. <sup>b</sup> Determined by SEC. <sup>c</sup> The ratio of the two monomer units in the number of styrene in each chain, calculated from the <sup>1</sup>HNMR spectra of the copolymers using  $N_S:N_D=(6a-9f)/5f$  (1), (a, b, c, d, e, and f stand for the areas of the corresponding peaks). <sup>d</sup> The average number of DPE-SiH in each chain is calculated from the <sup>1</sup>HNMR spectra  $N_D=f/d$  (2). <sup>e</sup> The average number of styrene in each chain is calculated from the <sup>1</sup>HNMR spectra  $N_S=(6a-9f)/5d$  (3). <sup>g</sup> The relative conversion of DPE-SiH. <sup>h</sup> The relative conversion of St.

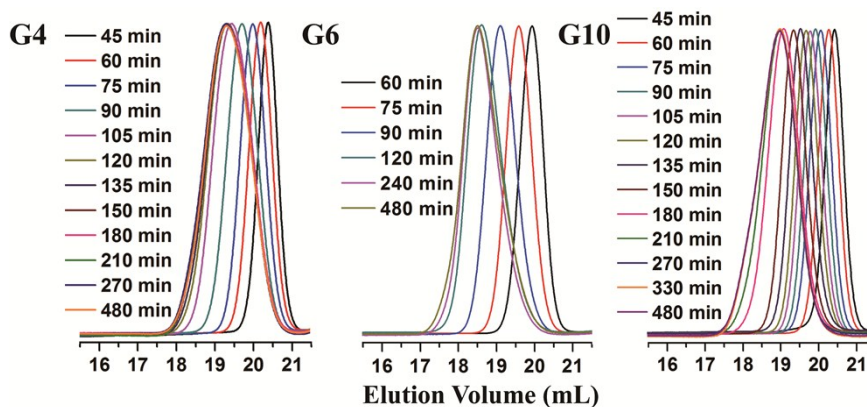

Figure 1S. SEC curves of samples from: G3, G4 and G6.

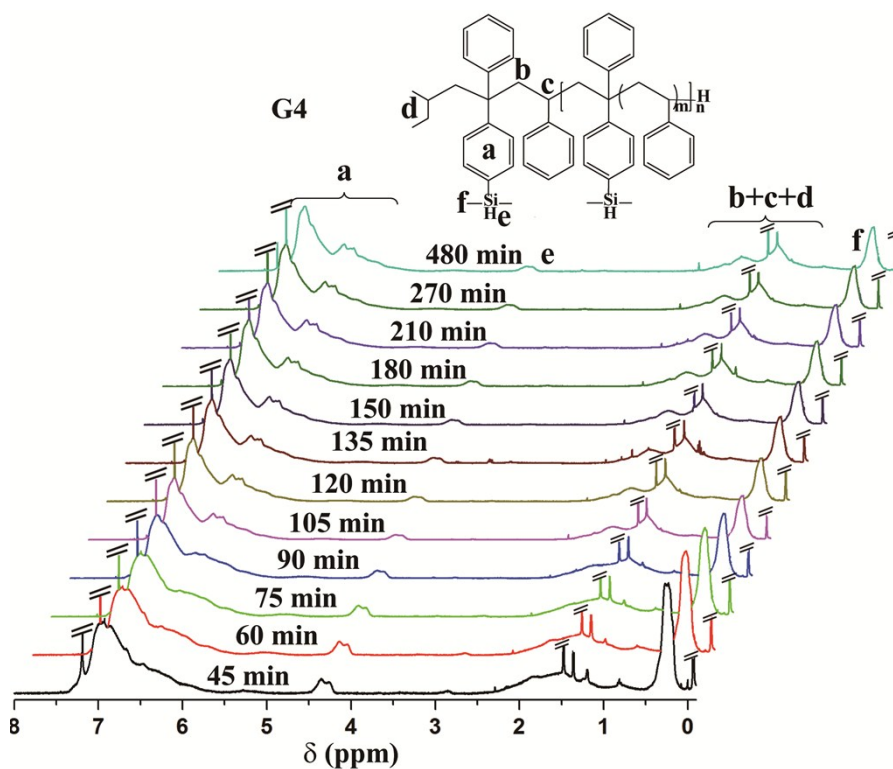

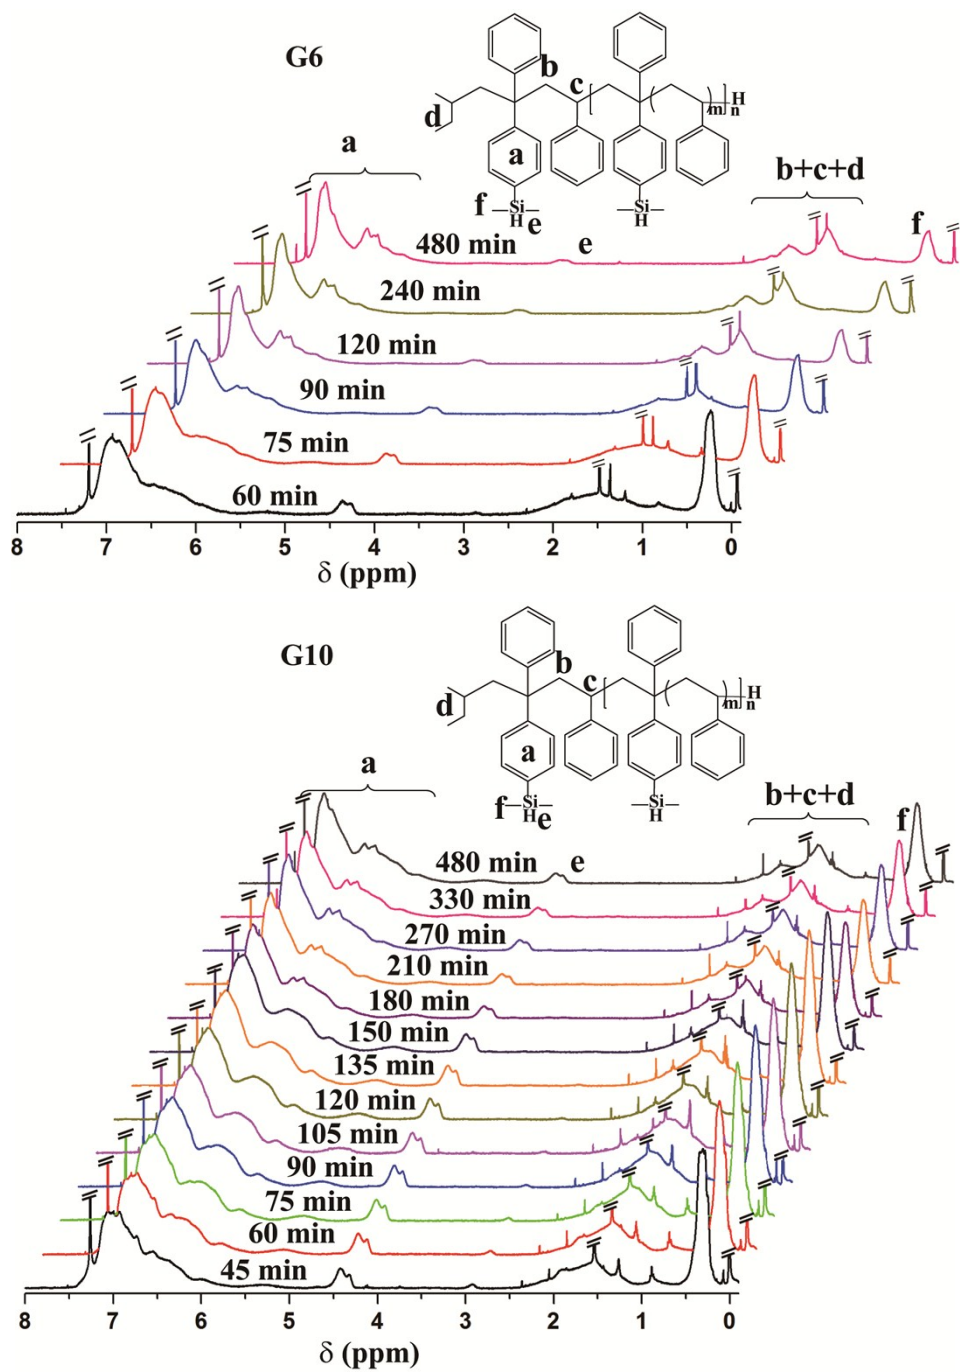

Figure 2S. <sup>1</sup>H NMR spectra of samples from: G4, G6 and G10.

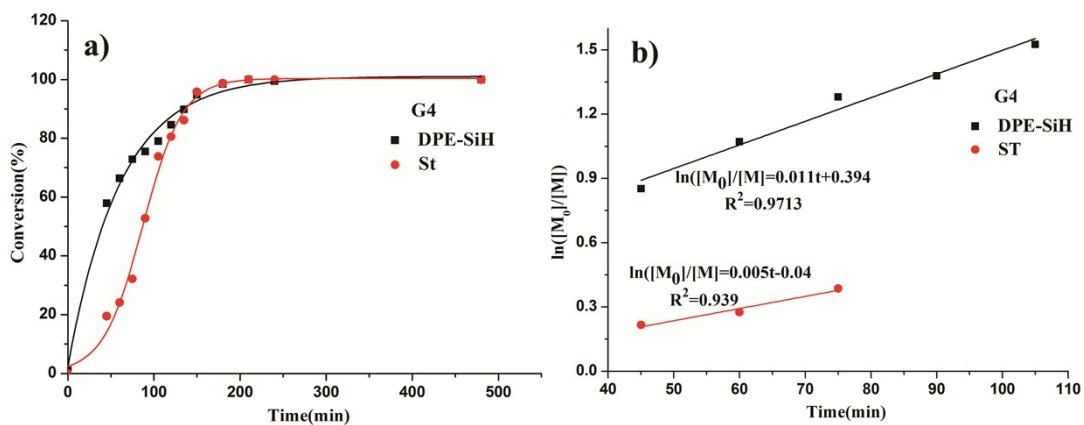

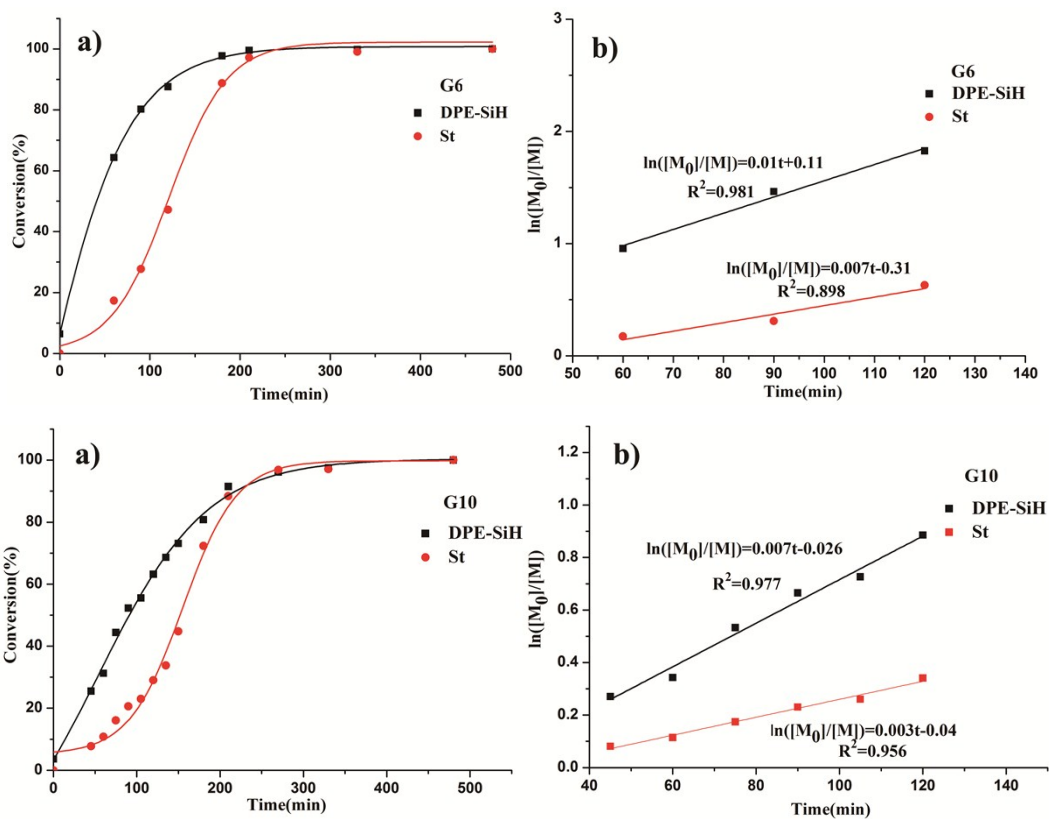

**Figure 3S.** a) The curves of conversion vs. time and b) liner kinetic curves for **G4**, **G6** and **G10**.

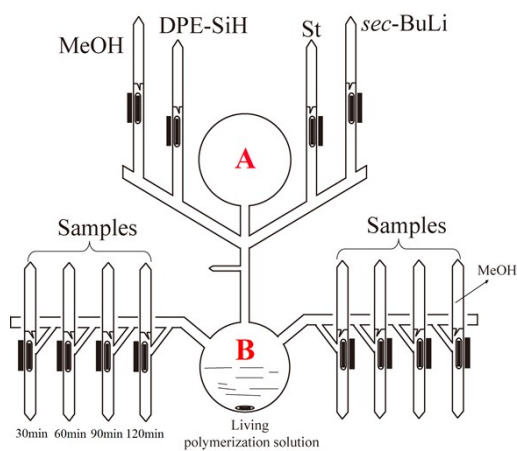

**Figure 4S.** The timing-sample apparatus for styrene and DPE-SiH.
